# Supplementary material for: Receptor-Binding Domain (RBD) Antibodies Contribute More to SARS-CoV-2 Neutralization When Target Cells Express High Levels of ACE2
Source: MDPI journal article supplement (doi:10.3390/v14092061), 2022-09-16
Supplement: s1 [file s1]

S1

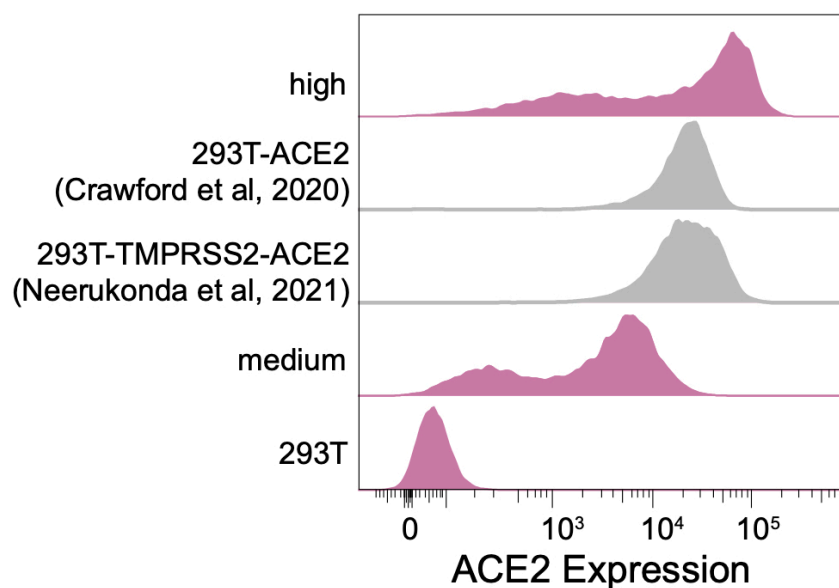

**Figure S1.** ACE2 expression in previously published ACE2 over-expressing 293T cells commonly used for spike-pseudotyped lentiviral neutralization assays. This figure compares ACE2 expression in the high and medium ACE2 cells described in the current paper (Fig 1A) to the 293T-ACE2 cells described by [14]) and 293T-TMPRSS2-ACE2 cells described by [15]). These data were acquired in a separate experiment from that shown in Figure 1A. The medium and high ACE2 cell clones were not pre-treated with puromycin to purge cells that had lost ACE2 expression prior to running this experiment, likely explaining the larger tail of non-expressing cells relative to Figure 1A.

S2

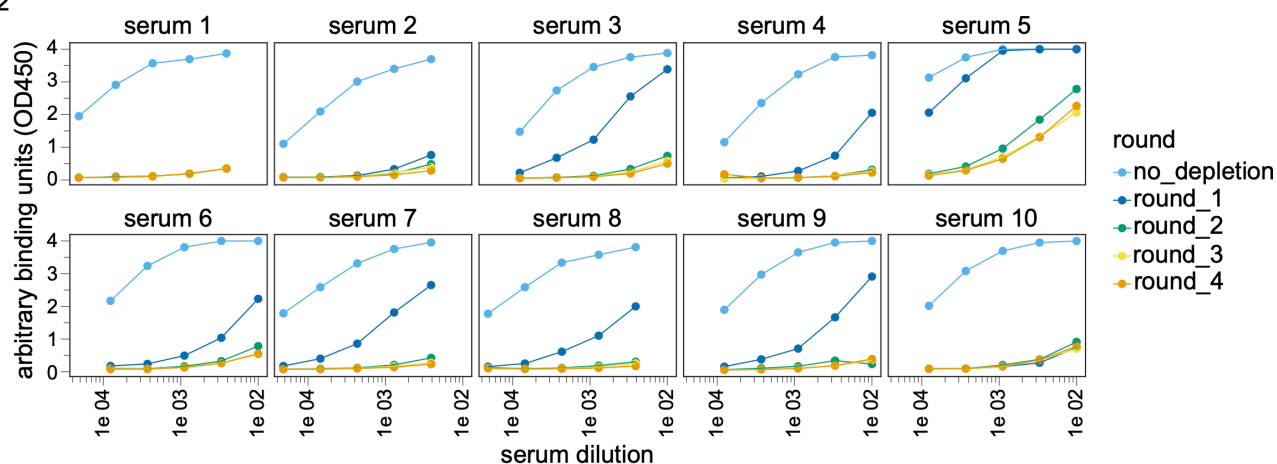

**Figure S2. ELISAs showing depletion of RBD-targeting antibodies from sera.** ELISA binding curves for serum samples used in lentiviral pseudotype neutralization assays shown in Fig 2. Sera were depleted of RBD-targeting antibodies using four rounds of the process shown in Fig 2A, and binding to RBD was measured by ELISA after each round.

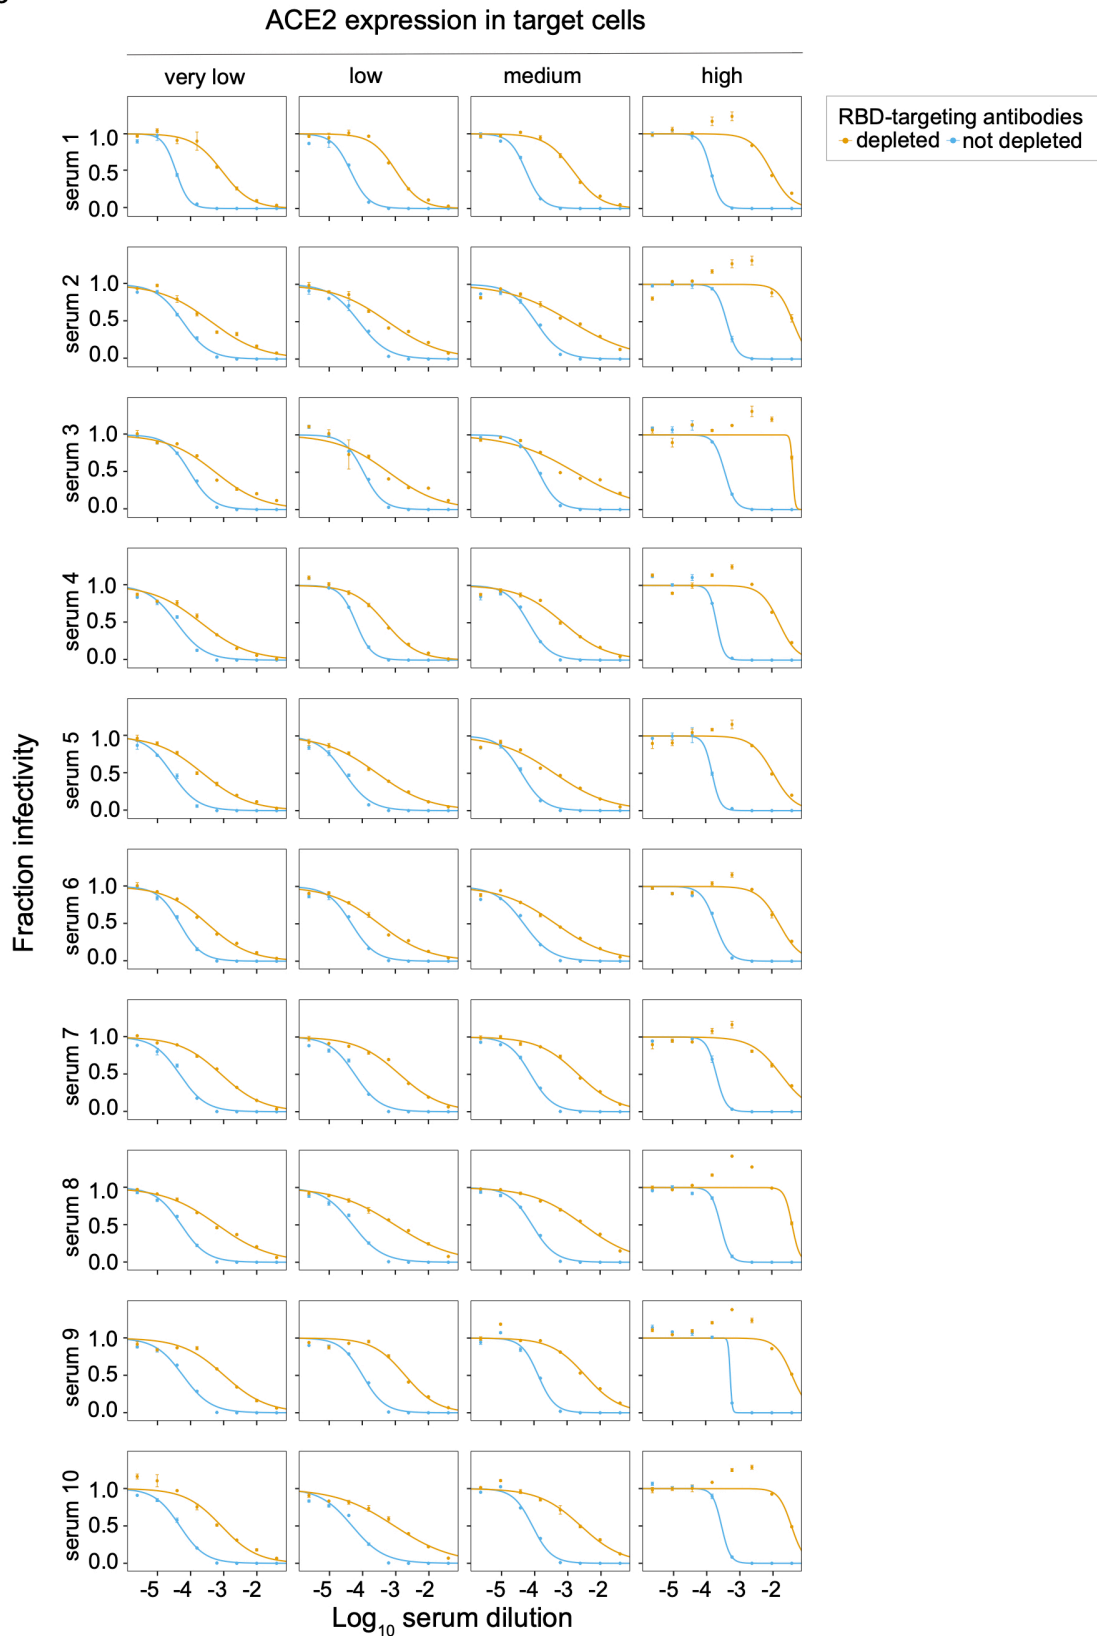

**Figure S3. Spike-pseudotyped lentiviral particle neutralization with RBD-depleted and non-depleted sera summarized in Fig 2.** Pseudovirus neutralization for RBD-depleted and non-depleted sera was measured on cells expressing different amounts of ACE2. IC<sub>50</sub> values were calculated using the neutcurve software package (<https://jbloomlab.github.io/neutcurve/>, version 0.5.7), by fitting a Hill curve and fixing the top of the curve to one and bottom to zero. NT<sub>50</sub> values from these neutralization curves were used to plot Fig 2B and calculate values for Figures 2C and D.

**Table S1. Characteristics of sera used in this study.** Participant SARS-CoV-2 immune history, age, sex, illness severity, vaccine type, approximate sample collection date, days post second vaccine dose (at time of sample collection), and approximate date of symptom onset.

| <b>Sample</b> | <b>SARS-CoV-2 immune history</b>   | <b>Age</b> | <b>Sex</b> | <b>Illness severity</b> | <b>Vaccine</b> | <b>Sample collection date</b> | <b>Days post second dose</b> | <b>Symptom onset</b> |
|---------------|------------------------------------|------------|------------|-------------------------|----------------|-------------------------------|------------------------------|----------------------|
| Serum 1       | Vaccinated 2x, previously infected | 36         | Female     | Mild, non-hospitalized  | Pfizer         | Jan-Feb 2021                  | 10                           | Mar 2020             |
| Serum 2       | Vaccinated 2x, previously infected | 72         | Female     | Mild, non-hospitalized  | Pfizer         | Mar-Apr 2021                  | 15                           | Mar 2020             |
| Serum 3       | Vaccinated 2x, previously infected | 50         | Male       | Mild, non-hospitalized  | Pfizer         | May-Jun 2021                  | 27                           | Mar 2020             |
| Serum 4       | Vaccinated 2x, previously infected | 64         | Female     | Mild, non-hospitalized  | Pfizer         | May-Jun 2021                  | 18                           | Mar 2020             |
| Serum 5       | Vaccinated 2x, previously infected | 47         | Female     | Mild, non-hospitalized  | Pfizer         | Jan-Feb 2021                  | 10                           | Mar 2020             |
| Serum 6       | Vaccinated 2x, previously infected | 37         | Female     | Mild, non-hospitalized  | Moderna        | May-Jun 2021                  | 36                           | Apr 2020             |
| Serum 7       | Vaccinated 2x, previously infected | 60         | Female     | Mild, non-hospitalized  | Pfizer         | Mar-Apr 2021                  | 9                            | Mar 2020             |
| Serum 8       | Vaccinated 2x, previously infected | 53         | Male       | Mild, non-hospitalized  | Pfizer         | Jan-Feb 2021                  | 8                            | Mar 2020             |
| Serum 9       | Vaccinated 2x, previously infected | 43         | Male       | Mild, non-hospitalized  | Pfizer         | May-Jun 2021                  | 19                           | Mar 2020             |
| Serum 10      | Vaccinated 2x, previously infected | 41         | Female     | Mild, non-hospitalized  | Pfizer         | May-Jun 2021                  | 29                           | Jun 2020             |
